# Supplementary material
Source: Springer Nature journal article supplement (https://www.springermedizin.de/resource/supplementary/12883_2006_29_MOESM1_ESM.pdf/9456854)
Supplement: MOESM1 [file 9456854]

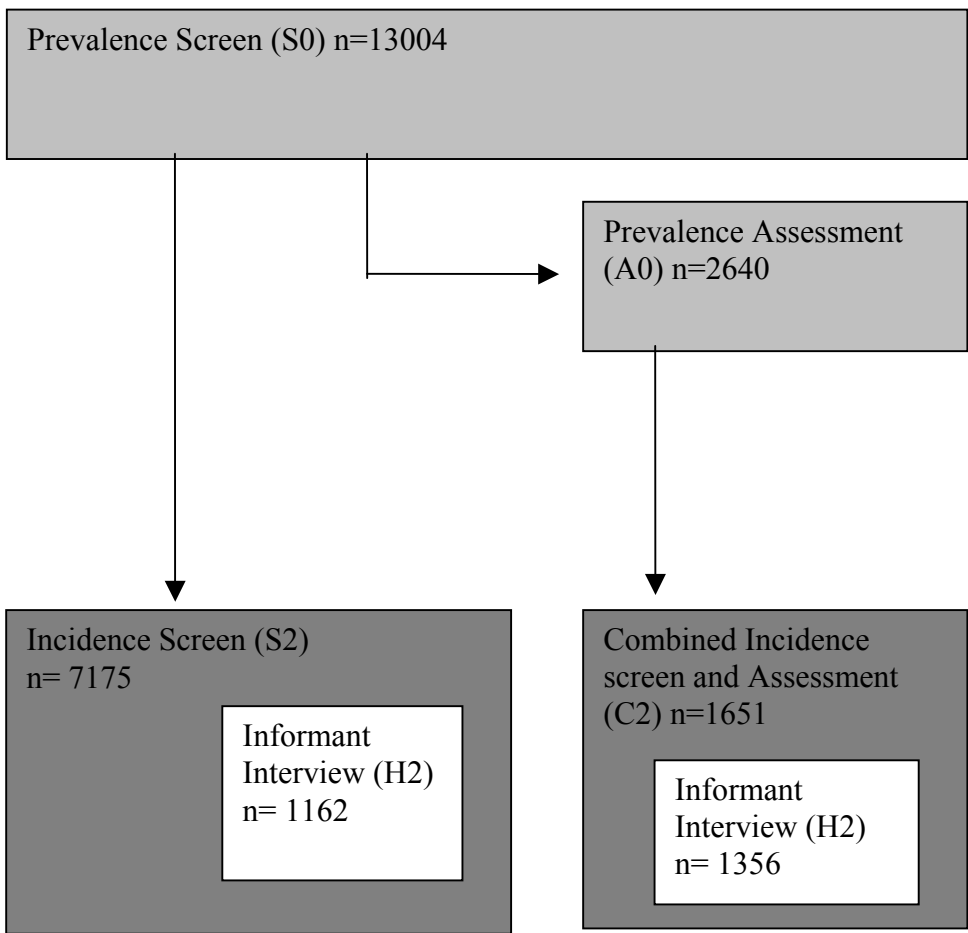

Prevalence Screen (S0) n=13004

Prevalence Assessment (A0) n=2640

Incidence Screen (S2)  
n= 7175

Informant Interview (H2)  
n= 1162

Combined Incidence screen and Assessment (C2) n=1651

Informant Interview (H2)  
n= 1356
